# Supplementary material for: A tris(2-aminoethyl)amine-based zinc complex as a highly water-soluble drug carrier for the anti-COVID-19 drug favipiravir: a joint experimental and theoretical study
Source: Royal Society of Chemistry journal article supplement (doi:10.1039/d3dt00256j), 2023-01-01
Supplement: d3dt00256j1.pdf [file d3dt00256j1.pdf]

## ***Supporting Information for:***

### ***A tris(2-aminoethyl)amine-based zinc complex as a highly water-soluble drug carrier for the anti-COVID-19 drug favipiravir: A joint Experimental and Theoretical study***

Farshid Hajibabaei<sup>a</sup>, Samaneh Sanei Movafagh<sup>a</sup>, Sadegh Salehzadeh<sup>a\*</sup>, Robert William Gable<sup>b</sup>

<sup>a</sup> Faculty of Chemistry, Bu-Ali Sina University, Hamedan, Iran

<sup>b</sup> School of Chemistry, University of Melbourne, Victoria 3010, Australia

\*Corresponding authors. E-mail addresses: [saleh@basu.ac.ir](mailto:saleh@basu.ac.ir) (S. Salehzadeh)

## Contains:

|                                                                                                                                                                                                                                                                                                                                                                        |   |
|------------------------------------------------------------------------------------------------------------------------------------------------------------------------------------------------------------------------------------------------------------------------------------------------------------------------------------------------------------------------|---|
| <b>Table S1.</b> Crystal data and structure refinement for <b>1</b> , <b>2</b> and <b>3</b> complexes.....                                                                                                                                                                                                                                                             | 2 |
| <b>Table S2.</b> Selected Bond Lengths (Å) and Angles (°) for <i>N/O</i> -coordinated complexes and FAV anion in a previously reported organic salt [ref. 42].....                                                                                                                                                                                                     | 3 |
| <b>Table S3.</b> Calculated <sup>a</sup> <b>gas phase</b> electronic energies, enthalpies and Gibbs free energies (Hartree) of optimized structures of all studied conformers of keto and enol tautomers of FAV at M06-D3/def2-TZVPP level of theory.....                                                                                                              | 4 |
| <b>Table S4.</b> Solvation energies ( $G_{\text{solv}}$ , Hartree) and Gibbs free energies ( $G_{\text{solut}}$ , Hartree) <sup>a</sup> of the studied keto and enol isomers/conformers of FAV in H <sub>2</sub> O, CH <sub>3</sub> OH and DMSO solutions at M06-D3/def2-TZVPP level of theory.....                                                                    | 4 |
| <b>Table S5.</b> Calculated Gibbs free energies (G, Hartree) of the optimized structures of studied keto and enol isomers/conformers of FAV in H <sub>2</sub> O, CH <sub>3</sub> OH and DMSO solutions at M06-D3/def2-TZVPP level of theory.....                                                                                                                       | 5 |
| <b>Table S6.</b> The comparison of calculated <sup>a</sup> and experimental selected distances (Å) for [Zn(tren)( <i>N</i> -FAV)] <sup>+</sup> and [Zn(tren)( <i>O</i> -FAV)] <sup>+</sup> complexes. ....                                                                                                                                                             | 6 |
| <b>Table S7.</b> The calculated <sup>a</sup> and experimental data for intramolecular hydrogen bond in [Zn(tren)( <i>N</i> -FAV)] <sup>+</sup> and [Zn(tren)( <i>O</i> -FAV)] <sup>+</sup> complexes. ....                                                                                                                                                             | 6 |
| <b>Table S8.</b> Calculated interaction energy (IE, kcal/mol) between the FAV anion and [Zn(tren)] <sup>2+</sup> cation in [Zn(tren)( <i>N</i> -FAV)] <sup>+</sup> and [Zn(tren)( <i>O</i> -FAV)] <sup>+</sup> complexes, and also their total interaction energy (IE <sub>total</sub> , kcal/mol) at the M06-D3/def2-TZVPP and B3LYP/def2-TZVPP levels of theory..... | 7 |
| <b>Table S9.</b> Gas phase calculated <sup>a</sup> electronic energy (E, kcal/mol) and Gibbs free energy (G, kcal/mol) of <i>N/O</i> -coordinated complexes of FAV and the transition state (TS) of interconversion between them.....                                                                                                                                  | 7 |
| <b>Table S10.</b> Comparison of calculated solvation energies for <i>N/O</i> -coordinated complexes of FAV and the transition state (TS) of interconversion between them.....                                                                                                                                                                                          | 7 |
| <b>Table S11.</b> Calculated <sup>a</sup> <b>gas phase</b> electronic energies, enthalpies and Gibbs free energies (Hartree) of all species involved in equations <b>1-3<sup>b</sup></b> .....                                                                                                                                                                         | 8 |
| <b>Table S12.</b> Calculated <sup>a</sup> electronic energies ( $\Delta E$ , kcal/mol), enthalpies ( $\Delta H$ , kcal/mol), and Gibbs free energies ( $\Delta G$ , kcal/mol) of the <b>gas phase</b> protonation process of <i>N/O</i> -coordinated complexes by considering equations <b>1-3<sup>b</sup></b> .....                                                   | 8 |
| <b>Table S13.</b> Solvation energies of all species involved in equations <b>1-3<sup>b</sup></b> in H <sub>2</sub> O and CH <sub>3</sub> OH solutions.....                                                                                                                                                                                                             | 9 |

**Figure S1.** Potential energy scan for the rotation of the carboxamide group on the favipiravir anion.....10

**Figure S2.** AutoDock4 poses of FAV (a), Drug carrier (b), *O*-Coord complex (c) and *N*-Coord complex (d) in the interaction with DNA (PDB ID: 1BND).....11

**Table S1.** Crystal data and structure refinement for **1**, **2** and **3** complexes.

|                                    |                                                                     |                                                                     |                                                                                |
|------------------------------------|---------------------------------------------------------------------|---------------------------------------------------------------------|--------------------------------------------------------------------------------|
| Empirical formula                  | C <sub>11</sub> H <sub>23</sub> ClFN <sub>7</sub> O <sub>3</sub> Zn | C <sub>12</sub> H <sub>25</sub> ClFN <sub>7</sub> O <sub>3</sub> Zn | C <sub>12</sub> H <sub>36</sub> Cl <sub>6</sub> N <sub>8</sub> Zn <sub>3</sub> |
| Formula weight                     | 421.18                                                              | 435.21                                                              | 701.30                                                                         |
| Temperature/K                      | 100.0(2)                                                            | 100.0(10)                                                           | 100.0(2)                                                                       |
| Crystal system                     | triclinic                                                           | monoclinic                                                          | monoclinic                                                                     |
| Space group                        | P-1                                                                 | Cc                                                                  | P21/c                                                                          |
| a/Å                                | 7.5403(15)                                                          | 13.1029(4)                                                          | 8.0201(16)                                                                     |
| b/Å                                | 10.171(2)                                                           | 18.5099(6)                                                          | 16.781(3)                                                                      |
| c/Å                                | 11.342(2)                                                           | 7.7230(2)                                                           | 19.809(4)                                                                      |
| α/°                                | 79.19(3)                                                            | 90                                                                  | 90                                                                             |
| β/°                                | 88.86(3)                                                            | 90.067(3)                                                           | 95.86(3)                                                                       |
| γ/°                                | 74.13(3)                                                            | 90                                                                  | 90                                                                             |
| Volume/Å <sup>3</sup>              | 821.4(3)                                                            | 1873.08(10)                                                         | 2652.0(9)                                                                      |
| Z                                  | 2                                                                   | 4                                                                   | 4                                                                              |
| ρ <sub>calc</sub> /cm <sup>3</sup> | 1.703                                                               | 1.543                                                               | 1.756                                                                          |
| μ/mm <sup>-1</sup>                 | 1.696                                                               | 1.490                                                               | 3.313                                                                          |
| F(000)                             | 436.0                                                               | 904.0                                                               | 1424.0                                                                         |
| Crystal size/mm <sup>3</sup>       | 0.04 × 0.01 × 0.01                                                  | 0.59 × 0.18 × 0.11                                                  | 0.04 × 0.005 × 0.005                                                           |
| Radiation                          | Synchrotron (λ =                                                    | Mo Kα (λ = 0.71073 Å)                                               | Synchrotron (λ =                                                               |
| 2θ range for data collection/°     | 0.71076Å)                                                           | 6.218 to 60.744                                                     | 0.71092 Å)                                                                     |
| Index ranges                       | 3.658 to 58.414                                                     | -18 ≤ h ≤ 18, -25 ≤ k ≤                                             | 3.188 to 64.358                                                                |
|                                    | -10 ≤ h ≤ 10, -13 ≤ k ≤                                             | 25, -10 ≤ l ≤ 10                                                    | -11 ≤ h ≤ 11, -25 ≤ k ≤                                                        |
|                                    | 13, -15 ≤ l ≤ 14                                                    | 15847                                                               | 25, -29 ≤ l ≤ 29                                                               |
| Reflections collected              | 21370                                                               | 5008 [Rint = 0.0216,                                                | 91824                                                                          |
| Independent reflections            | 3766 [Rint = 0.0424,                                                | Rsigma = 0.0226]                                                    | 8417 [Rint = 0.0331,                                                           |
|                                    | Rsigma = 0.0297]                                                    | 5008/2/228                                                          | Rsigma = 0.0156]                                                               |
| Data/restraints/parameters         | 3766/0/220                                                          | 1.040                                                               | 8417/10/279                                                                    |
| Goodness-of-fit on F <sup>2</sup>  | 1.097                                                               | R1 = 0.0183, wR2 =                                                  | 1.056                                                                          |
| Final R indexes [I ≥ 2σ            | R1 = 0.0363, wR2 =                                                  | 0.0455                                                              | R1 = 0.0268, wR2 =                                                             |
| (I)]                               | 0.1044                                                              | R1 = 0.0193, wR2 =                                                  | 0.0740                                                                         |
| Final R indexes [all data]         | R1 = 0.0379, wR2 =                                                  | 0.0461                                                              | R1 = 0.0274, wR2 =                                                             |
| Largest diff. peak/hole / e        | 0.1058                                                              | 0.32/-0.19                                                          | 0.0744                                                                         |
| Å <sup>-3</sup>                    | 1.07/-0.92                                                          | -0.005(3)                                                           | 0.82/-1.22                                                                     |
| Flack parameter                    |                                                                     |                                                                     |                                                                                |

**Table S2.** Selected Bond Lengths (Å) and Angles (°) for *N/O*-coordinated complexes and FAV anion in a previously reported organic salt [Ref. 45].

| <b>Bond lengths</b>   | <b>O-coordinated</b> | <b>N-coordinated</b> | <b>FAV Anion Ref. 45</b> |          |
|-----------------------|----------------------|----------------------|--------------------------|----------|
| Zn1-O1/N5             | 2.0192(15)           | 2.0992(18)           |                          |          |
| Zn1-N1                | 2.3107(16)           | 2.3108(18)           |                          |          |
| Zn1-N2                | 2.0505(17)           | 2.0542(19)           |                          |          |
| Zn1-N3                | 2.0693(17)           | 2.0650(18)           |                          |          |
| Zn1-N4                | 2.0690(17)           | 2.0992(18)           |                          |          |
| F1-C9                 | 1.356(2)             | 1.357(2)             | 1.352(3)                 | 1.359(3) |
| O1-C7                 | 1.286(2)             | 1.263(3)             | 1.280(3)                 | 1.281(3) |
| O2-C11                | 1.237(3)             | 1.242(3)             | 1.244(3)                 | 1.243(3) |
| N5-C7                 | 1.356(3)             | 1.380(3)             | 1.368(3)                 | 1.367(3) |
| N5-C8                 | 1.320(3)             | 1.336(3)             | 1.317(4)                 | 1.318(4) |
| N6-C9                 | 1.301(3)             | 1.309(3)             | 1.297(3)                 | 1.299(3) |
| N6-C10                | 1.341(3)             | 1.333(3)             | 1.333(3)                 | 1.342(3) |
| N7-C11                | 1.333(3)             | 1.332(3)             | 1.321(3)                 | 1.331(3) |
| C7-C10                | 1.430(3)             | 1.451(3)             | 1.443(3)                 | 1.430(3) |
| C8-C9                 | 1.376(3)             | 1.376(3)             | 1.379(4)                 | 1.384(4) |
| C10-C11               | 1.503(3)             | 1.503(3)             | 1.495(3)                 | 1.495(3) |
| <b>Angles</b>         |                      |                      |                          |          |
| O1/N5-Zn1-N1          | 172.75(6)            | 178.23(6)            |                          |          |
| O1/N5-Zn1-N2          | 105.95(7)            | 101.41(7)            |                          |          |
| O1/N5-Zn1-N3          | 100.78(7)            | 99.17(7)             |                          |          |
| O1/N5-Zn1-N4          | 92.56(6)             | 99.31(7)             |                          |          |
| N2-Zn1-N1             | 79.73(6)             | 80.29(7)             |                          |          |
| N2-Zn1-N3             | 118.97(7)            | 120.37(7)            |                          |          |
| N2-Zn1-N4             | 117.67(7)            | 110.24(8)            |                          |          |
| N3-Zn1-N1             | 79.87(6)             | 80.33(7)             |                          |          |
| N4-Zn1-N1             | 80.70(6)             | 79.56(7)             |                          |          |
| N4-Zn1-N3             | 114.66(7)            | 120.60(8)            |                          |          |
| <b>Torsion Angles</b> |                      |                      |                          |          |
| N2-Zn1-O1/N5-C7       | -40.82(17)           | 161.89(13)           |                          |          |
| N3-Zn1-O1/N5-C7       | 83.73(16)            | -74.40(14)           |                          |          |
| N4-Zn1-O1/N5-C7       | -160.57(16)          | 48.89(14)            |                          |          |
| N1-C1-C2-N2           | 53.2(2)              | -53.2(2)             |                          |          |
| N1-C3-C4-N3           | 56.8(2)              | -54.5(2)             |                          |          |
| N1-C5-C6-N4           | 57.2(2)              | -50.8(2)             |                          |          |

**Table S3.** Calculated<sup>a</sup> gas phase electronic energies, enthalpies and Gibbs free energies (Hartree) of optimized structures of all studied conformers of keto and enol tautomers of FAV at M06-D3/def2-TZVPP level of theory.

|         | E (Eel + ZPE) | H           | G           |
|---------|---------------|-------------|-------------|
| Enol-1  | -607.324520   | -607.314926 | -607.358484 |
| Enol-1' | -607.311484   | -607.301387 | -607.346699 |
| Enol-2  | -607.307899   | -607.297823 | -607.343288 |
| Keto-1  | -607.306247   | -607.296389 | -607.340967 |
| Keto-2  | -607.301249   | -607.291122 | -607.336658 |
| Enol-2' | -607.300596   | -607.290785 | -607.335041 |

**Table S4.** Solvation energies ( $G_{\text{solv}}$ , Hartree) and Gibbs free energies ( $G_{\text{solut}}$ , Hartree)<sup>a</sup> of the studied keto and enol isomers/conformers of FAV in H<sub>2</sub>O, CH<sub>3</sub>OH and DMSO solutions at M06-D3/def2-TZVPP level of theory.

| Conformer/<br>isomer | H <sub>2</sub> O  |                    | CH <sub>3</sub> OH |                               | DMSO              |                               |
|----------------------|-------------------|--------------------|--------------------|-------------------------------|-------------------|-------------------------------|
|                      | $G_{\text{solv}}$ | $G_{\text{solut}}$ | $G_{\text{solv}}$  | $G_{\text{solut}}^{\text{a}}$ | $G_{\text{solv}}$ | $G_{\text{solut}}^{\text{a}}$ |
| <b>Enol-1</b>        |                   |                    |                    |                               |                   |                               |
| PCM                  | -0.01045402       | -607.368938        | -0.01015124        | -607.368635                   | -0.010310601      | -607.368794                   |
| CPCM                 | -0.01053370       | -607.369018        | -0.01031060        | -607.368794                   | -0.010422153      | -607.368906                   |
| SMD                  | -0.01627067       | -607.374754        | -0.01344999        | -607.371934                   | -0.013226891      | -607.371711                   |
| <b>Enol-1'</b>       |                   |                    |                    |                               |                   |                               |
| PCM                  | -0.01351374       | -607.360213        | -0.01309940        | -607.359798                   | -0.013306571      | -607.360005                   |
| CPCM                 | -0.01360935       | -607.360308        | -0.01332250        | -607.360021                   | -0.013465931      | -607.360165                   |
| SMD                  | -0.02197576       | -607.368675        | -0.01996782        | -607.366667                   | -0.014677068      | -607.361376                   |
| <b>Enol-2</b>        |                   |                    |                    |                               |                   |                               |
| PCM                  | -0.01623880       | -607.359527        | -0.01572884        | -607.359017                   | -0.015983821      | -607.359272                   |
| CPCM                 | -0.01635035       | -607.359638        | -0.01598382        | -607.359272                   | -0.016175054      | -607.359463                   |
| SMD                  | -0.02482831       | -607.368116        | -0.02215106        | -607.365439                   | -0.017210895      | -607.360498                   |
| <b>Keto-1</b>        |                   |                    |                    |                               |                   |                               |
| PCM                  | -0.02113115       | -607.362098        | -0.02047778        | -607.361445                   | -0.020812434      | -607.361779                   |
| CPCM                 | -0.02127458       | -607.362242        | -0.02079650        | -607.361763                   | -0.021051474      | -607.362018                   |
| SMD                  | -0.02868482       | -607.369652        | -0.02739401        | -607.368361                   | -0.025115157      | -607.366082                   |
| <b>Keto-2</b>        |                   |                    |                    |                               |                   |                               |
| PCM                  | -0.02197576       | -607.358633        | -0.02129051        | -607.357948                   | -0.021641106      | -607.358299                   |
| CPCM                 | -0.02211919       | -607.358777        | -0.02160923        | -607.358267                   | -0.021880147      | -607.358538                   |
| SMD                  | -0.03019874       | -607.366857        | -0.02930633        | -607.365964                   | -0.025513558      | -607.362171                   |
| <b>Enol-2'</b>       |                   |                    |                    |                               |                   |                               |
| PCM                  | -0.01719496       | -607.352236        | -0.01663719        | -607.351678                   | -0.016924046      | -607.351965                   |
| CPCM                 | -0.01732244       | -607.352363        | -0.01695592        | -607.351997                   | -0.017147150      | -607.352188                   |
| SMD                  | -0.02656533       | -607.361606        | -0.02315503        | -607.358196                   | -0.020573393      | -607.355613                   |

$$^{\text{a}}G_{\text{solut}} = G_{\text{gas}} + G_{\text{solv}}$$

**Table S5.** Calculated Gibbs free energies (G, Hartree) of the optimized structures of studied keto and enol isomers/conformers of FAV in H<sub>2</sub>O, CH<sub>3</sub>OH and DMSO solutions at M06-D3/def2-TZVPP level of theory.

| Isomer/conformer | Solvent            | Model       |             |             |
|------------------|--------------------|-------------|-------------|-------------|
|                  |                    | PCM         | CPCM        | SMD         |
|                  | H <sub>2</sub> O   |             |             |             |
| Enol-1           |                    | -607.369620 | -607.369695 | -607.376366 |
| Keto-1           |                    | -607.362384 | -607.362537 | -607.371100 |
| Enol-1'          |                    | -607.360765 | -607.360850 | -607.368290 |
| Enol-2           |                    | -607.359870 | -607.359975 | -607.368966 |
| Keto-2           |                    | -607.359552 | -607.359680 | -607.368387 |
| Enol-2'          |                    | -607.353062 | -607.353222 | -607.363991 |
|                  | CH <sub>3</sub> OH |             |             |             |
| Enol-1           |                    | -607.369282 | -607.369456 | -607.373305 |
| Keto-1           |                    | -607.361684 | -607.362037 | -607.369494 |
| Enol-1'          |                    | -607.360343 | -607.360547 | -607.368252 |
| Enol-2           |                    | -607.359387 | -607.359590 | -607.366170 |
| Keto-2           |                    | -607.358853 | -607.359157 | -607.367883 |
| Enol-2'          |                    | -607.352447 | -607.352814 | -607.360190 |
|                  | DMSO               |             |             |             |
| Enol-1           |                    | -607.369456 | -607.369580 | -607.372455 |
| Keto-1           |                    | -607.362045 | -607.362296 | -607.366935 |
| Enol-1'          |                    | -607.360562 | -607.360704 | -607.361846 |
| Enol-2           |                    | -607.359636 | -607.359790 | -607.362173 |
| Keto-2           |                    | -607.359214 | -607.359424 | -607.363234 |
| Enol-2'          |                    | -607.352764 | -607.353026 | -607.356860 |

**Table S6.** The comparison of calculated<sup>a</sup> and experimental selected distances (Å) for [Zn(tren)(*N*-FAV)]<sup>+</sup> and [Zn(tren)(*O*-FAV)]<sup>+</sup> complexes.

| <b>Bond</b>   | <b>[Zn(tren)(<i>N</i>-FAV)]<sup>+</sup></b> |        | <b>[Zn(tren)(<i>O</i>-FAV)]<sup>+</sup></b> |        |
|---------------|---------------------------------------------|--------|---------------------------------------------|--------|
|               | Exp.                                        | Theo.  | Exp.                                        | Theo.  |
| <b>Length</b> |                                             |        |                                             |        |
| Zn1-O1/N5     | 2.0992(18)                                  | 2.0354 | 2.0192(15)                                  | 1.9494 |
| Zn1-N1        | 2.3108(18)                                  | 2.3198 | 2.3107(16)                                  | 2.3502 |
| Zn1-N2        | 2.0542(19)                                  | 2.1478 | 2.0505(17)                                  | 2.1179 |
| Zn1-N3        | 2.0650(18)                                  | 2.1331 | 2.0693(17)                                  | 2.1128 |
| Zn1-N4        | 2.0992(18)                                  | 2.1374 | 2.0690(17)                                  | 2.1233 |
| <b>Angle</b>  |                                             |        |                                             |        |
| O1/N5-Zn1-N1  | 178.23(6)                                   | 173.87 | 172.75(6)                                   | 178.09 |
| O1/N5-Zn1-N2  | 101.41(7)                                   | 105.99 | 105.95(7)                                   | 100.54 |
| O1/N5-Zn1-N3  | 99.17(7)                                    | 100.24 | 100.78(7)                                   | 102.83 |
| O1/N5-Zn1-N4  | 99.31(7)                                    | 97.33  | 92.56(6)                                    | 99.66  |
| N2-Zn1-N1     | 80.29(7)                                    | 79.77  | 79.73(6)                                    | 78.37  |
| N2-Zn1-N3     | 120.37(7)                                   | 110.71 | 118.97(7)                                   | 124.20 |
| N2-Zn1-N4     | 110.24(8)                                   | 110.11 | 117.67(7)                                   | 112.76 |
| N3-Zn1-N1     | 80.33(7)                                    | 79.28  | 79.87(6)                                    | 79.06  |
| N4-Zn1-N1     | 79.56(7)                                    | 78.47  | 80.70(6)                                    | 79.41  |
| N4-Zn1-N3     | 120.60(8)                                   | 128.51 | 114.66(7)                                   | 112.13 |

<sup>a</sup> At the M06-D3/def2-TZVPP level of theory

**Table S7.** The calculated<sup>a</sup> and experimental data for intramolecular hydrogen bond in [Zn(tren)(*N*-FAV)]<sup>+</sup> and [Zn(tren)(*O*-FAV)]<sup>+</sup> complexes.

| <b>Complex</b> | <b>X-Ray</b> |          |         |
|----------------|--------------|----------|---------|
|                | d(D-H)/Å     | d(H-A)/Å | D-H-A/° |
| N-Coord        | 0.86         | 1.94     | 139.3   |
| O-Coord        | 0.88         | 1.94     | 137.3   |
| <b>Theo.</b>   |              |          |         |
| N-Coord        | 1.00         | 1.95     | 133.7   |
| O-Coord        | 1.00         | 1.94     | 132.9   |

<sup>a</sup> At the M06-D3/def2-TZVPP level of theory

**Table S8.** Calculated interaction energy (IE, kcal/mol) between the FAV anion and  $[\text{Zn}(\text{tren})]^{2+}$  cation in  $[\text{Zn}(\text{tren})(N\text{-FAV})]^+$  and  $[\text{Zn}(\text{tren})(O\text{-FAV})]^+$  complexes, and also their total interaction energy ( $\text{IE}_{\text{total}}$ , kcal/mol) at the M06-D3/def2-TZVPP and B3LYP/def2-TZVPP levels of theory

|                                       | M06-D3  |         | B3LYP   |         |
|---------------------------------------|---------|---------|---------|---------|
|                                       | O-Coord | N-Coord | O-Coord | N-Coord |
| IE                                    | -208.80 | -210.57 | -199.03 | -199.28 |
| $\text{IE}_{\text{total}}^{\text{a}}$ | -561.43 | -561.00 | -554.25 | -551.72 |

$$^{\text{a}}\text{IE}_{\text{total}} = E_{\text{Complex}} - (E_{\text{FAV}} + E_{\text{Zn}} + E_{\text{tren}})$$

**Table S9.** Gas phase calculated<sup>a</sup> electronic energy (E, kcal/mol) and Gibbs free energy (G, kcal/mol) of *N/O*-coordinated complexes of FAV and the transition state (TS) of interconversion between them

|                                            | E ( $E_{\text{el}} + \text{ZPE}$ ) | $G_{\text{gas}}$    |
|--------------------------------------------|------------------------------------|---------------------|
| $[\text{Zn}(\text{tren})(O\text{-FAV})]^+$ | -2844.047176 (0.29) <sup>b</sup>   | -2844.099479 (0.00) |
| $[\text{Zn}(\text{tren})(N\text{-FAV})]^+$ | -2844.047644 (0.00)                | -2844.099300 (0.11) |
| TS                                         | -2844.042242 (3.39)                | -2844.093907 (3.49) |

<sup>a</sup> At M06-D3/def2-TZVPP level of theory

<sup>b</sup> Figures in parentheses show their relative energies

**Table S10.** Comparison of calculated solvation energies for *N/O*-coordinated complexes of FAV and the transition state (TS) of interconversion between them

|                                            | $G_{\text{solv}}$  |                  |        |                    |                  |        |
|--------------------------------------------|--------------------|------------------|--------|--------------------|------------------|--------|
|                                            | SMD                |                  |        | CPCM               |                  |        |
|                                            | CH <sub>3</sub> OH | H <sub>2</sub> O | DMSO   | CH <sub>3</sub> OH | H <sub>2</sub> O | DMSO   |
| $[\text{Zn}(\text{tren})(O\text{-FAV})]^+$ | -80.68             | -76.73           | -76.52 | -64.08             | -65.41           | -64.77 |
| $[\text{Zn}(\text{tren})(N\text{-FAV})]^+$ | -79.28             | -75.78           | -75.13 | -63.36             | -64.68           | -64.04 |
| TS                                         | -80.36             | -76.73           | -75.96 | -63.37             | -64.69           | -64.06 |



**Table S11.** Calculated<sup>a</sup> **gas phase** electronic energies, enthalpies and Gibbs free energies (Hartree) of all species involved in equations 1-3<sup>b</sup>

|                                         | <b>E</b> ( $E_{el} + ZPE$ ) | <b>H</b>     | <b>G</b>     |
|-----------------------------------------|-----------------------------|--------------|--------------|
| [Zn(tren)( <i>N</i> -FAV)] <sup>+</sup> | -2844.047644                | -2844.024320 | -2844.099300 |
| [Zn(tren)( <i>O</i> -FAV)] <sup>+</sup> | -2844.047176                | -2844.023776 | -2844.099479 |
| [Zn(tren)Cl] <sup>+</sup>               | -2697.545260                | -2697.530060 | -2697.586074 |
| FAV                                     | -607.324520                 | -607.314926  | -607.358484  |
| H <sub>2</sub> O                        | -76.404885                  | -76.401105   | -76.423165   |
| H <sub>3</sub> O <sup>+</sup>           | -76.669535                  | -76.665657   | -76.688667   |
| Cl <sup>-</sup>                         | -460.249229                 | -460.246869  | -460.264252  |
| CH <sub>3</sub> OH <sub>2</sub>         | -115.936896                 | -115.932084  | -115.961361  |
| CH <sub>3</sub> OH                      | -115.651860                 | -115.647497  | -115.674698  |
| [ZnTrenH <sub>2</sub> O] <sup>2+</sup>  | -2313.376398                | -2313.360160 | -2313.417333 |

<sup>a</sup>At M06-D3/def2-TZVPP level of theory

<sup>b</sup> see manuscript

**Table S12.** Calculated<sup>a</sup> electronic energies ( $\Delta E$ , kcal/mol), enthalpies ( $\Delta H$ , kcal/mol), and Gibbs free energies ( $\Delta G$ , kcal/mol) of the **gas phase** protonation process of *N/O*-coordinated complexes by considering equations 1-3<sup>b</sup>

| <b>Eq.</b> | <b>Isomer</b> | <b><math>\Delta E</math></b> | <b><math>\Delta H</math></b> | <b><math>\Delta G</math></b> |
|------------|---------------|------------------------------|------------------------------|------------------------------|
| <b>(1)</b> | O-Coord       | -193.73                      | -194.39                      | -197.87                      |
|            | N-Coord       | -193.43                      | -194.05                      | -197.98                      |
| <b>(2)</b> | O-Coord       | -180.93                      | -181.82                      | -184.59                      |
|            | N-Coord       | -180.64                      | -181.48                      | -184.70                      |
| <b>(3)</b> | O-Coord       | 9.91                         | 9.00                         | 7.73                         |
|            | N-Coord       | 10.20                        | 9.34                         | 7.62                         |

<sup>a</sup> At M06-D3/def2-TZVPP level of theory

<sup>b</sup> see manuscript

**Table S13.** Solvation energies of all species involved in equations 1-3<sup>b</sup> in H<sub>2</sub>O and CH<sub>3</sub>OH solutions

| <b>H<sub>2</sub>O</b>                        | <b>PCM</b> | <b>CPCM</b> | <b>SMD</b> |
|----------------------------------------------|------------|-------------|------------|
| [Zn(tren)( <i>N</i> -FAV)] <sup>+</sup>      | -64.52     | -64.68      | -75.78     |
| [Zn(tren)( <i>O</i> -FAV)] <sup>+</sup>      | -65.27     | -65.41      | -76.73     |
| [Zn(tren)Cl] <sup>+</sup>                    | -56.46     | -56.53      | -63.54     |
| FAV                                          | -6.56      | -6.61       | -10.21     |
| H <sub>2</sub> O                             | -4.22      | -4.24       | -7.36      |
| H <sub>3</sub> O <sup>+</sup>                | -77.36     | -77.37      | -95.57     |
| Cl <sup>-</sup>                              | -72.92     | -72.92      | -67.29     |
| [Zn(tren)H <sub>2</sub> O] <sup>2+</sup>     | -165.80    | -165.82     | -184.96    |
| <b>CH<sub>3</sub>OH</b>                      |            |             |            |
| [Zn(tren)( <i>N</i> -FAV)] <sup>+</sup>      | -63.01     | -63.36      | -79.28     |
| [Zn(tren)( <i>O</i> -FAV)] <sup>+</sup>      | -63.76     | -64.08      | -80.68     |
| [Zn(tren)Cl] <sup>+</sup>                    | -55.30     | -55.45      | -69.68     |
| FAV                                          | -6.37      | -6.47       | -8.44      |
| H <sub>2</sub> O                             | -4.10      | -4.16       | -7.45      |
| H <sub>3</sub> O <sup>+</sup>                | -75.95     | -75.96      | -95.52     |
| Cl <sup>-</sup>                              | -71.59     | -71.59      | -67.86     |
| CH <sub>3</sub> OH <sub>2</sub> <sup>+</sup> | -65.34     | -65.35      | -79.69     |
| CH <sub>3</sub> OH                           | -2.89      | -2.94       | -4.65      |

<sup>b</sup> see manuscript

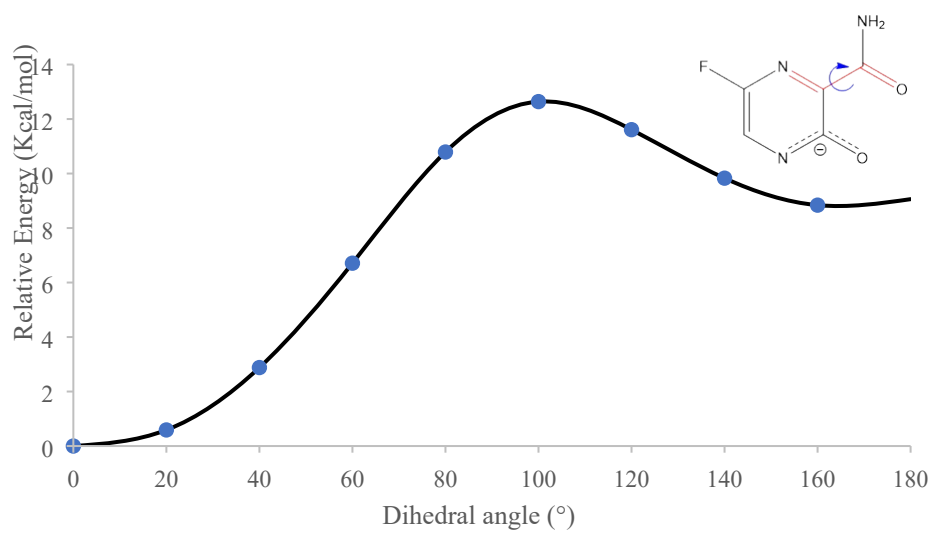

**Figure S1.** Potential energy scan for the rotation of the carboxamide group on the favipiravir anion.

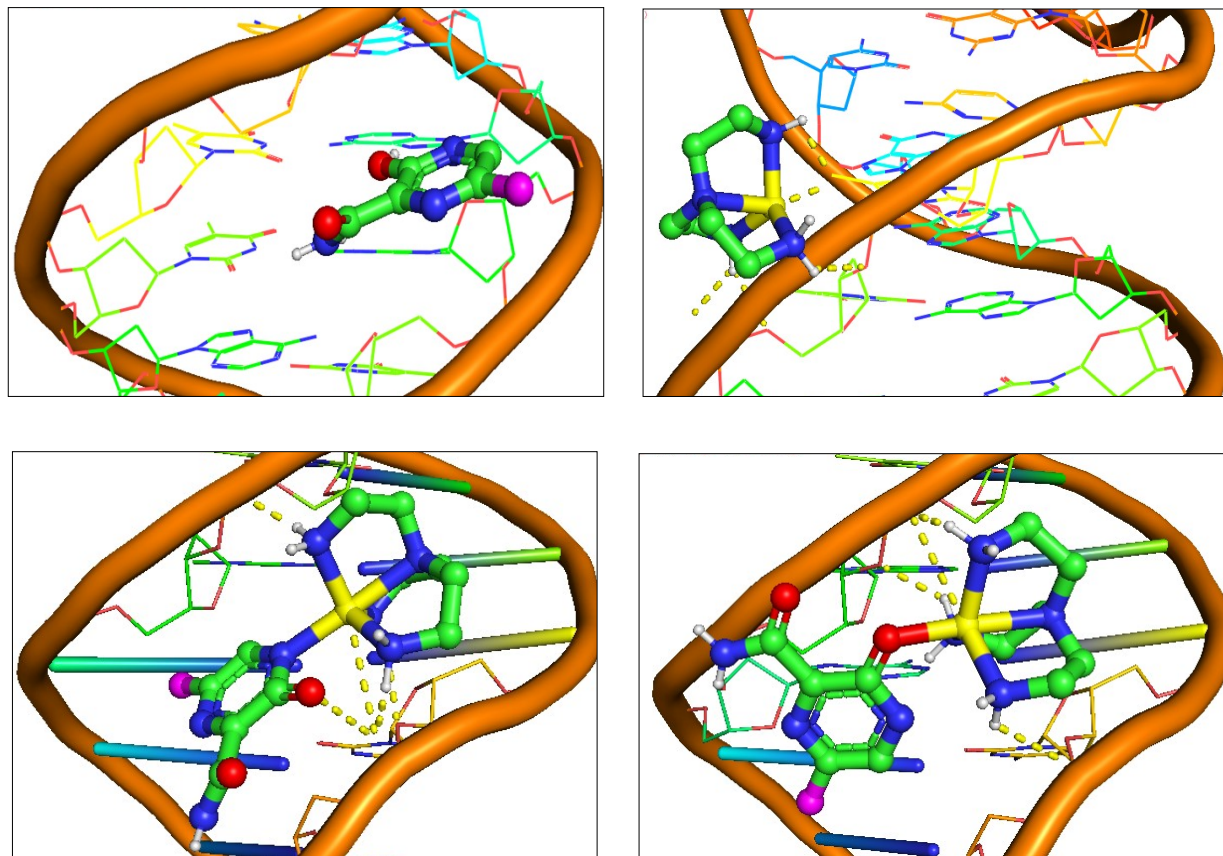

**Figure S2.** AutoDock4 poses of FAV (a), Drug carrier (b), *O*-Coord complex (c) and *N*-Coord complex (d) in the interaction with DNA (PDB ID: 1BND)
